# Supplementary material for: Deep learning enabled classification of real-time respiration signals acquired by MoSSe quantum dot-based flexible sensors
Source: Royal Society of Chemistry journal article supplement (doi:10.1039/d1tb01237a), 2021-01-01
Supplement: d1tb01237a1.pdf [file d1tb01237a1.pdf]

## Supplementary Information

### Deep Learning Enabled Classification of Real Time Respiration Signals Acquired by MoS<sub>2</sub> Quantum Dots based Flexible Sensor

Naveen Bokka<sup>1</sup>, Jay Karhade<sup>1</sup>, and Parikshit Sahatiya<sup>1\*</sup>

<sup>1</sup>Department of Electrical and Electronics Engineering, Birla Institute of Technology and Science Pilani Hyderabad Campus, Hyderabad 500078, India

\*E-mail of Corresponding Author: parikshit@hyderabad.bits-pilani.ac.in.

**Table T1: Rise time and fall time of different breath patterns**

| S.no | Breath Pattern | Rise time | Fall time |
|------|----------------|-----------|-----------|
| 1    | Normal Breath  | 290 msec  | 3.67 sec  |
| 2    | Slow Breath    | 330 msec  | 4.10 sec  |
| 3    | Deep Breath    | 130 msec  | 5.66 sec  |
| 4    | Fast Breath    | 180 msec  | 1.14 sec  |

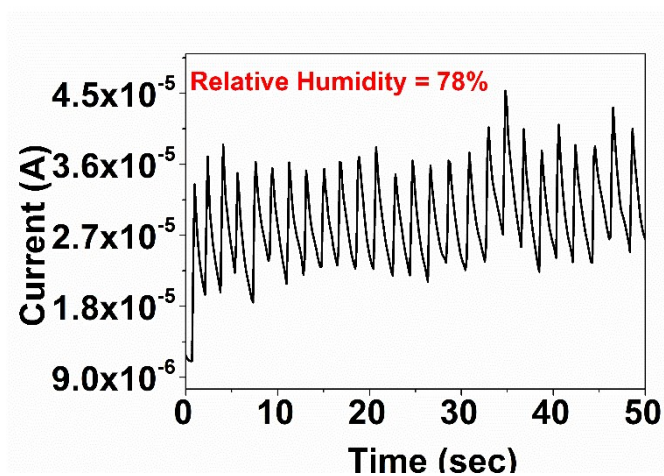

Figure S1: The MoS<sub>2</sub> QDs/PVA sensor detect current peaks under high humidity condition.

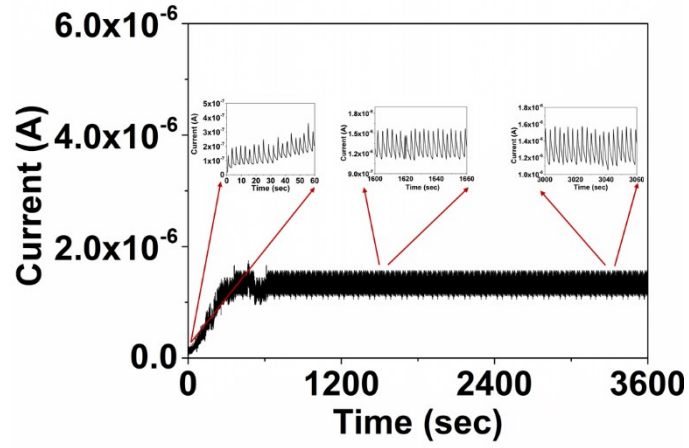

Figure S2: Stability test for the fabricated MoSSe QDs/PVA sensor for one hour

| Breath Data feed to neural network                                                 |          | Label |
|------------------------------------------------------------------------------------|----------|-------|
| <p style="writing-mode: vertical-rl; transform: rotate(180deg);">Normal Breath</p> | <p>0</p> |       |

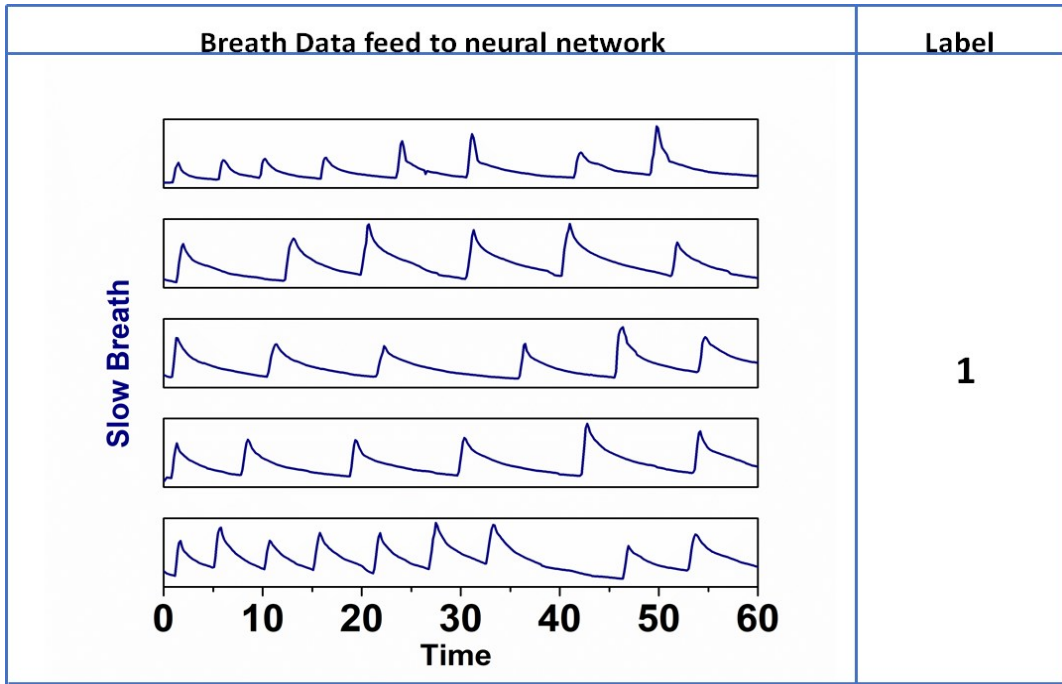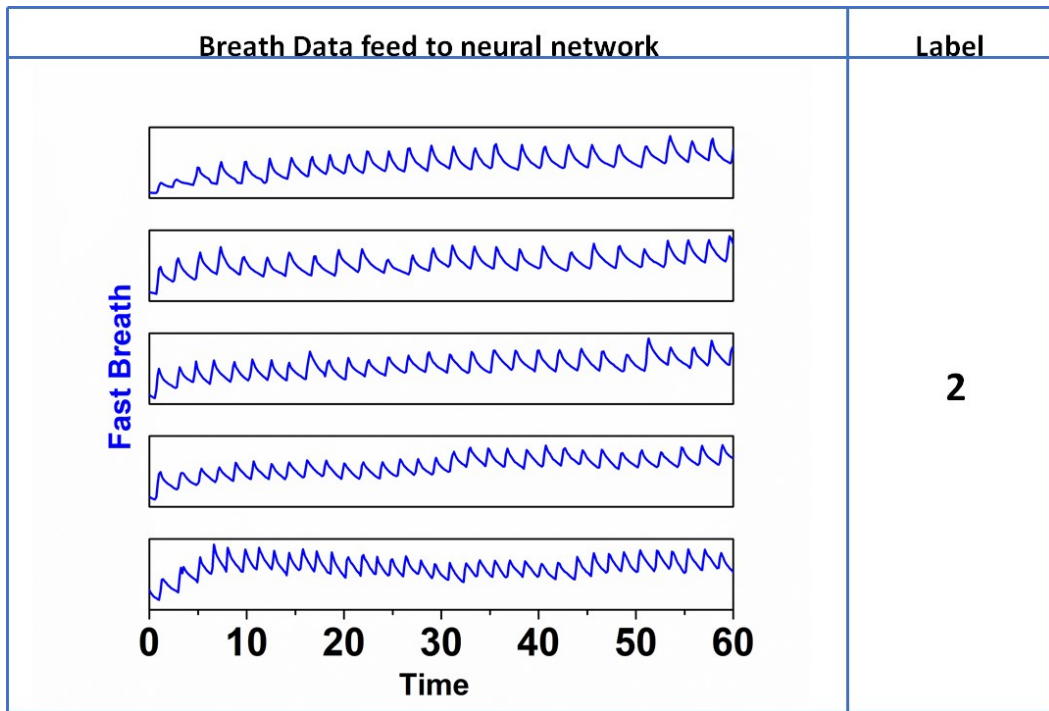

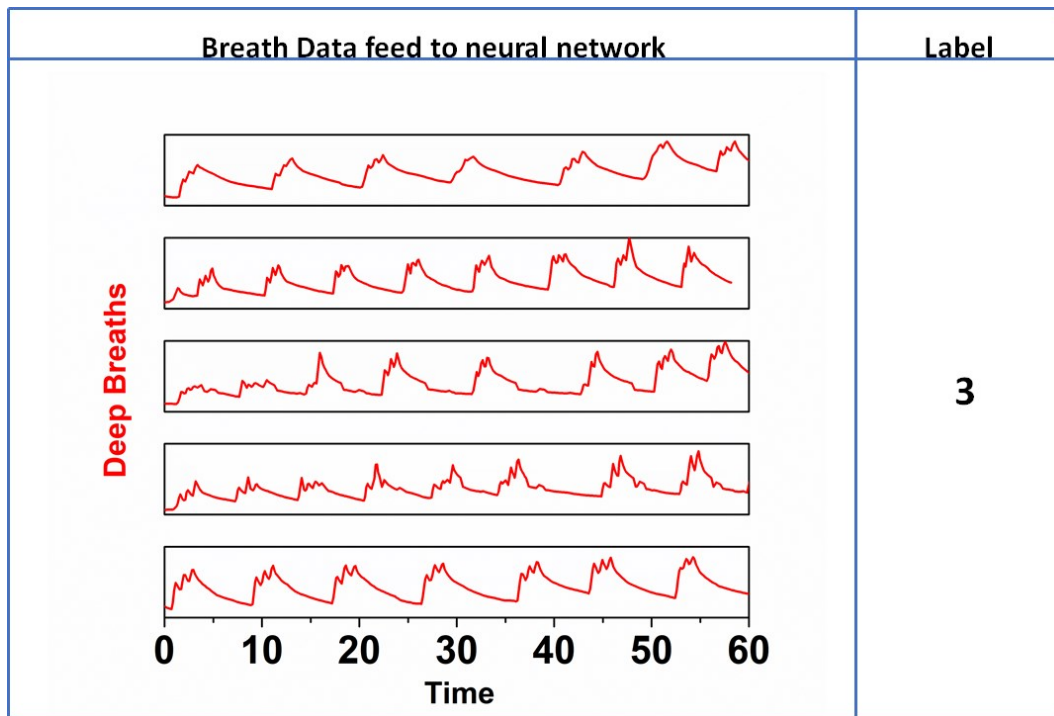

**Figure S3:** Labelling 0,1,2, and 3 to normal, slow, fast, and deep breaths data for training and testing the 1D-CNN model.

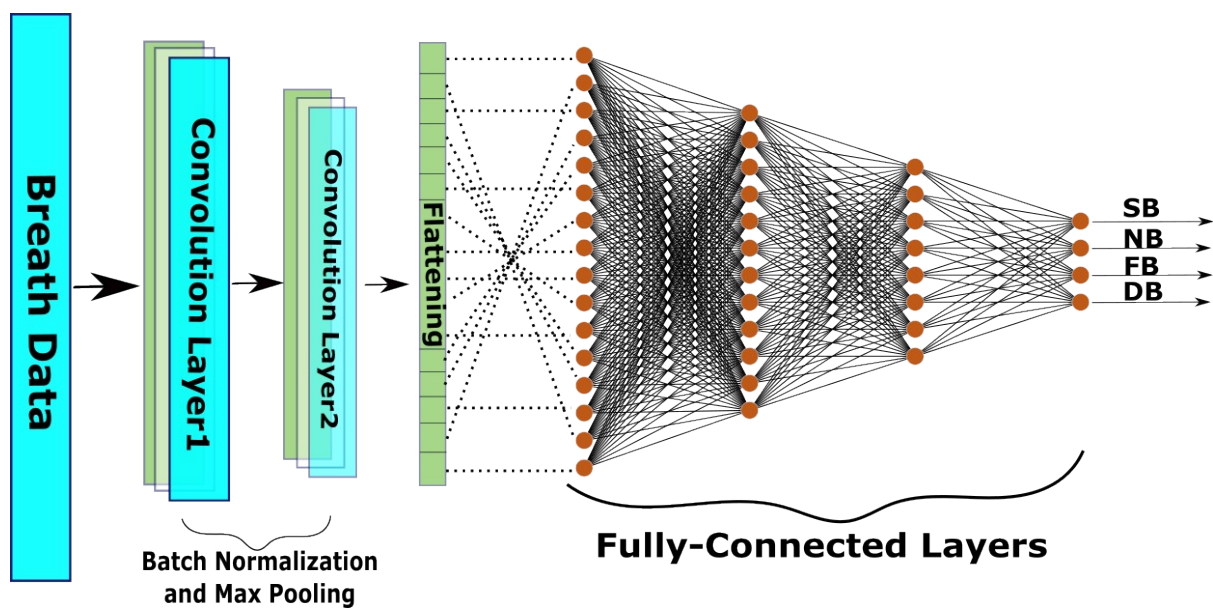

**Figure S4:** Typical CNN architecture

**Table T2: Comparison of 1D-CNN with Different state of art algorithms.**

| Algorithms | Accuracy (10-fold cross validation) |        |       |       |
|------------|-------------------------------------|--------|-------|-------|
|            | NB                                  | SB     | FB    | DB    |
| 1D-CNN     | 98.18%                              | 95.25% | 98.1% | 97.6% |
| DNN        | 88%                                 | 92%    | 96%   | 98%   |

|     |     |     |     |     |
|-----|-----|-----|-----|-----|
| KNN | 75% | 89% | 94% | 88% |
| SVM | 87% | 95% | 92% | 98% |
| DT  | 68% | 83% | 84% | 91% |
| RF  | 89% | 88% | 93% | 96% |

**Table T3: Comparison of overall accuracy of 1D-CNN with Different ML algorithms.**

| Algorithm                      | Accuracy | F-1 Score | Precision | Sensitivity |
|--------------------------------|----------|-----------|-----------|-------------|
| 1-D CNN                        | 0.96     | 0.96      | 0.96      | 0.97        |
| DNN<br>(extracted<br>features) | 0.9386   | 0.9385    | 0.9385    | 0.9385      |
| KNN (raw<br>data)              | 0.4379   | 0.43      | 0.44      | 0.44        |
| SVM (raw<br>data)              | 0.71     | 0.69      | 0.71      | 0.76        |
| KNN<br>(extracted<br>features) | 0.8771   | 0.88      | 0.88      | 0.88        |
| SVM<br>(extracted<br>features) | 0.9385   | 0.94      | 0.94      | 0.94        |
| DT (extracted<br>features)     | 0.82     | 0.82      | 0.84      | 0.82        |
| RF (extracted<br>features)     | 0.92     | 0.92      | 0.92      | 0.92        |

**List of extracted features:**

**For raw signal and 1<sup>st</sup> derivative:** mean, max, min, standard deviation, skewness, kurtosis, interquartile range, median absolute deviation, area under curve, area under squared curve.

**Raw signal DFT:** mean, max, min, standard deviation, skewness, kurtosis, interquartile range, median absolute deviation, area under curve, area under squared curve, weighted mean frequency, 5 first DFT coefficients, 5 first local maxima of DFT coefficients and their corresponding frequencies.

**Jerk DFT:** mean, max, min, standard deviation, skewness, kurtosis, interquartile range, median absolute deviation, area under curve, area under squared curve, weighted mean frequency, 5 first DFT coefficients, 5 first local maxima of DFT coefficients and their corresponding frequencies.

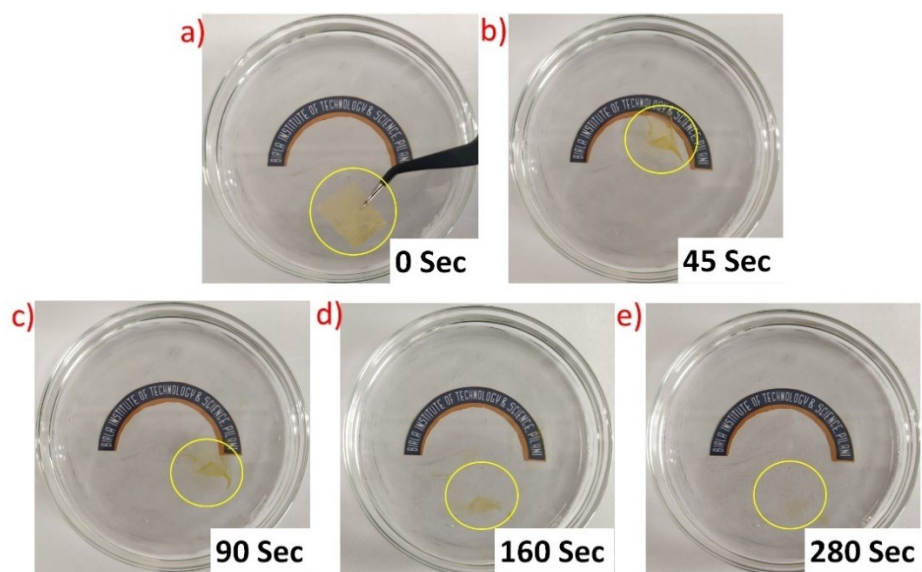

**Figure S5:** Transience of MoSSe QDs/PVA in DI water a) 0sec b) 45sec c) 90 sec d) 160 sec  
e) 280 sec.

#### **Consent statement**

The authors declare that informed consent was obtained from all the human participants for the experiments that involved them.
